# Supplementary material
Source: Springer Nature journal article supplement (https://www.springermedizin.de/resource/supplementary/12998_2013_104_MOESM3_ESM.pdf/9680168)
Supplement: MOESM3 [file 9680168]

122 studies via Medline

144 studies via Embase

Studies excluded  
- Duplication (n=113)

Studies screened by title and abstract  
(n=153)

Studies excluded  
- Did not meet inclusion criteria  
(n=120)

Studies screened by reading full text  
(n=33)

Studies excluded  
- No clinical follow-up TS  
(n=5)  
- Did not meet language  
criterion (n=2)  
- Not available in Dutch  
or British library (n=1)

Studies included for systematic review  
(n=25)
